# Supplementary material for: Limited duration of vaccine poliovirus and other enterovirus excretion among human immunodeficiency virus infected children in Kenya
Source: PubMed Central journal article supplement (PMC2739212; doi:10.1186/1471-2334-9-136), 2009-08-23
Supplement: 1471-2334-9-136-S1.pdf [file 1471-2334-9-136-S1.pdf]

Table S1. Study participants' age, HIV infection status, routine OPV immunization history and results of stool testing

| Participant ID/age, months | HIV infection status | Routine OPV doses     | Specimen Date | Specimen | Viral culture result | Genotype | Nucleotide changes, % | NPEV serotype |
|----------------------------|----------------------|-----------------------|---------------|----------|----------------------|----------|-----------------------|---------------|
| A/52                       | Inf.                 | Unk.                  | 9/16/98       | ST1      | NPEV                 |          |                       | EV80          |
|                            |                      |                       | 10/19/98      | ST2      | PV1                  | SABIN    | <u>0.33</u>           |               |
|                            |                      |                       | 11/2/98       | ST3      | PV1                  | SABIN    | <u>0.66</u>           |               |
|                            |                      |                       | 11/9/98       | ST4      | NEGATIVE             |          |                       |               |
|                            |                      |                       | 12/3/98       | ST5      | PV1                  | SABIN    |                       |               |
|                            |                      |                       | 12/8/98       | ST6      | PV1                  | SABIN    | <u>0.99</u>           |               |
|                            |                      |                       | 1/4/99        | ST7      | NEGATIVE             |          |                       |               |
|                            |                      |                       | 2/4/99        | ST8      | NEGATIVE             |          |                       |               |
|                            |                      |                       | 3/5/99        | ST9      | NEGATIVE             |          |                       |               |
|                            |                      |                       | 4/2/99        | ST10     | NEGATIVE             |          |                       |               |
|                            |                      |                       | 4/30/99       | ST11     | NPEV                 |          |                       | CA4           |
|                            |                      |                       | 6/25/99       | ST12     | NPEV                 |          |                       | E17           |
|                            |                      |                       | 7/22/99       | ST13     | NPEV                 |          |                       | E4            |
| C/27                       | Inf. (died in 2000)  | 3 doses, in 1996      | 9/16/98       | ST1      | PV1                  | SABIN    | <u>0</u>              |               |
|                            |                      |                       | 10/19/98      | ST2      | PV1                  | SABIN    | <u>0.11</u>           |               |
|                            |                      |                       | 11/2/98       | ST3      | PV2                  | SABIN    | 0.11                  |               |
|                            |                      |                       | 11/9/98       | ST4      | PV2                  | SABIN    | 0.11                  |               |
|                            |                      |                       | 12/3/98       | ST5      | NEGATIVE             |          |                       |               |
|                            |                      |                       | 12/8/98       | ST6      | NEGATIVE             |          |                       |               |
|                            |                      |                       | 1/4/99        | ST7      | NEGATIVE             |          |                       |               |
|                            |                      |                       | 2/4/99        | ST8      | NEGATIVE             |          |                       |               |
|                            |                      |                       | 3/5/99        | ST9      | NEGATIVE             |          |                       |               |
|                            |                      |                       | 4/2/99        | ST10     | NPEV                 |          |                       | E12           |
|                            |                      |                       | 4/30/99       | ST11     | NEGATIVE             |          |                       |               |
|                            |                      |                       | 5/28/99       | ST12     | NEGATIVE             |          |                       |               |
|                            |                      |                       | 6/25/99       | ST13     | NPEV                 |          |                       | E17           |
|                            |                      |                       | 7/22/99       | ST14     | NPEV                 |          |                       | E4            |
|                            |                      |                       | 8/18/99       | ST15     | NPEV                 |          |                       | E4            |
| D/27                       | Inf.                 | 3 doses, in 1996-1997 | 9/16/98       | ST1      | PV1                  | SABIN    | <u>0</u>              |               |
|                            |                      |                       | 10/19/98      | ST2      | NEGATIVE             |          |                       |               |
|                            |                      |                       | 11/2/98       | ST3      | PV2                  | SABIN    | 0.11                  |               |
|                            |                      |                       | 11/9/98       | ST4      | NEGATIVE             |          |                       |               |
|                            |                      |                       | 12/3/98       | ST5      | NEV                  |          |                       |               |
|                            |                      |                       | 12/8/98       | ST6      | NEGATIVE             |          |                       |               |
|                            |                      |                       | 4/1/99        | ST7      | NEGATIVE             |          |                       |               |
|                            |                      |                       | 2/4/99        | ST8      | NPEV                 |          |                       | E25           |
|                            |                      |                       | 3/5/99        | ST9      | NEGATIVE             |          |                       |               |
|                            |                      |                       | 4/2/99        | ST10     | NPEV                 |          |                       | E12           |
|                            |                      |                       | 4/30/99       | ST11     | NPEV                 |          |                       | CA4           |

| Participant ID/age, months | HIV infection status | Routine OPV doses     | Specimen Date | Specimen | Viral culture result | Genotype | Nucleotide changes, % | NPEV serotype |
|----------------------------|----------------------|-----------------------|---------------|----------|----------------------|----------|-----------------------|---------------|
|                            |                      |                       | 5/28/99       | ST12     | NPEV                 |          |                       | CA4           |
|                            |                      |                       | 6/25/99       | ST13     | NEGATIVE             |          |                       |               |
|                            |                      |                       | 7/22/99       | ST14     | NPEV                 |          |                       | E4            |
|                            |                      |                       | 8/18/99       | ST15     | NEGATIVE             |          |                       |               |
| E/33                       | Inf.                 | Unk.                  | 9/16/98       | ST1      | NEGATIVE             |          |                       |               |
|                            |                      |                       | 10/19/98      | ST2      | PV1                  | SABIN    | 0                     |               |
|                            |                      |                       | 11/2/98       | ST3      | NEGATIVE             |          |                       |               |
|                            |                      |                       | 11/9/98       | ST4      | NEGATIVE             |          |                       |               |
|                            |                      |                       | 12/3/98       | ST5      | NEGATIVE             |          |                       |               |
|                            |                      |                       | 12/8/99       | ST6      | NEGATIVE             |          |                       |               |
|                            |                      |                       | 2/4/99        | ST7      | NEGATIVE             |          |                       |               |
|                            |                      |                       | 3/5/99        | ST8      | NEGATIVE             |          |                       |               |
|                            |                      |                       | 4/2/99        | ST9      | NEGATIVE             |          |                       |               |
|                            |                      |                       | 4/30/99       | ST10     | NEGATIVE             |          |                       |               |
|                            |                      |                       | 5/28/99       | ST11     | NEGATIVE             |          |                       |               |
|                            |                      |                       | 6/25/99       | ST12     | NPEV                 |          |                       | E17           |
|                            |                      |                       | 7/22/99       | ST13     | NPEV                 |          |                       | E4            |
|                            |                      |                       | 8/18/99       | ST14     | NEGATIVE             |          |                       |               |
| F/45                       | Inf.                 | 3 doses, in 1996      | 9/16/98       | ST1      | PV1                  | SABIN    |                       |               |
|                            |                      |                       | 10/19/98      | ST2      | NEGATIVE             |          |                       |               |
|                            |                      |                       | 11/2/98       | ST3      | PV1                  | SABIN    |                       |               |
|                            |                      |                       | 11/9/98       | ST4      | PV1                  | SABIN    | 0                     |               |
|                            |                      |                       | 12/3/98       | ST5      | PV2                  | SABIN    |                       |               |
|                            |                      |                       | 12/8/98       | ST6      | PV2                  | SABIN    |                       |               |
|                            |                      |                       | 1/4/99        | ST7      | NEGATIVE             |          |                       |               |
|                            |                      |                       | 2/4/99        | ST8      | PV2                  | SABIN    | 0.22                  |               |
|                            |                      |                       | 3/5/99        | ST9      | NEGATIVE             |          |                       |               |
|                            |                      |                       | 4/2/99        | ST10     | NEGATIVE             |          |                       |               |
|                            |                      |                       | 4/30/99       | ST11     | NEGATIVE             |          |                       |               |
|                            |                      |                       | 5/28/99       | ST12     | NEGATIVE             |          |                       |               |
|                            |                      |                       | 6/25/99       | ST13     | NEGATIVE             |          |                       |               |
|                            |                      |                       | 7/22/99       | ST14     | NEGATIVE             |          |                       |               |
| G/33                       | Inf.                 | 4 doses, in 1996-1997 | 9/16/98       | ST1      | NEGATIVE             |          |                       |               |
|                            |                      |                       | 10/19/98      | ST2      | NEGATIVE             |          |                       |               |
|                            |                      |                       | 11/2/98       | ST3      | NEGATIVE             |          |                       |               |
|                            |                      |                       | 11/9/98       | ST4      | NEGATIVE             |          |                       |               |
|                            |                      |                       | 12/3/98       | ST5      | NEGATIVE             |          |                       |               |
|                            |                      |                       | 1/4/99        | ST6      | NEGATIVE             |          |                       |               |
|                            |                      |                       | 2/4/99        | ST7      | NEGATIVE             |          |                       |               |
|                            |                      |                       | 3/5/99        | ST8      | NEGATIVE             |          |                       |               |
|                            |                      |                       | 4/2/99        | ST9      | NEGATIVE             |          |                       |               |
|                            |                      |                       | 4/30/99       | ST10     | NPEV                 |          |                       | CA4           |
|                            |                      |                       | 5/28/99       | ST11     | NPEV                 |          |                       | CA4           |

| Participant ID/age, months | HIV infection status | Routine OPV doses                                                        | Specimen Date | Specimen | Viral culture result | Genotype | Nucleotide changes, %      | NPEV serotype |
|----------------------------|----------------------|--------------------------------------------------------------------------|---------------|----------|----------------------|----------|----------------------------|---------------|
|                            |                      |                                                                          | 6/25/99       | ST12     | NEGATIVE             |          |                            |               |
|                            |                      |                                                                          | 7/22/99       | ST13     | NPEV                 |          |                            | E4            |
| H/20                       | Inf. (died in 2000)  | Unk.                                                                     | 9/16/98       | ST1      | PV1,3                | SABIN    | <u>0</u> (PV1), 0.32 (PV3) |               |
|                            |                      |                                                                          | 10/19/98      | ST2      | NPEV                 |          |                            | EV80          |
|                            |                      |                                                                          | 11/2/98       | ST3      | PV1                  | SABIN    |                            |               |
|                            |                      |                                                                          | 11/9/98       | ST4      | NEGATIVE             |          |                            |               |
|                            |                      |                                                                          | 12/3/98       | ST5      | NEGATIVE             |          |                            |               |
|                            |                      |                                                                          | 12/8/98       | ST6      | NEGATIVE             |          |                            |               |
|                            |                      |                                                                          | 1/4/99        | ST7      | NEGATIVE             |          |                            |               |
|                            |                      |                                                                          | 2/4/99        | ST8      | NPEV                 |          |                            | E25           |
|                            |                      |                                                                          | 3/5/99        | ST9      | NPEV                 |          |                            | E25           |
|                            |                      |                                                                          | 4/2/99        | ST10     | NEGATIVE             |          |                            |               |
|                            |                      |                                                                          | 4/30/99       | ST11     | NPEV                 |          |                            | CA4           |
|                            |                      |                                                                          | 5/28/99       | ST12     | NEGATIVE             |          |                            |               |
|                            |                      |                                                                          | 6/25/99       | ST13     | NPEV                 |          |                            | CA4           |
|                            |                      |                                                                          | 7/22/99       | ST14     | NPEV                 |          |                            | E4            |
|                            |                      |                                                                          | 8/18/99       | ST15     | NPEV                 |          |                            | E4            |
| L/5                        | Inf.                 | 3 doses, shortly before and during enrolment (1/13/99, 2/10/99, 3/10/99) | 2/4/99        | ST1      | PV3                  | SABIN    |                            |               |
|                            |                      |                                                                          | 3/5/99        | ST2      | PV3                  | SABIN    |                            |               |
|                            |                      |                                                                          | 4/2/99        | ST3      | PV1,3                | SABIN    | 0 (PV1), 0.11 (PV3)        |               |
|                            |                      |                                                                          | 4/30/99       | ST4      | NPEV                 |          |                            | CA4           |
|                            |                      |                                                                          | 5/28/99       | ST5      | NEGATIVE             |          |                            |               |
|                            |                      |                                                                          | 6/25/99       | ST6      | NEGATIVE             |          |                            |               |
|                            |                      |                                                                          | 7/22/99       | ST7      | NEGATIVE             |          |                            |               |
|                            |                      |                                                                          | 8/18/99       | ST8      | NPEV                 |          |                            | E4            |
| M/34                       | Inf.                 | 3 doses, dates unk.                                                      | 2/4/99        | ST1      | NEGATIVE             |          |                            |               |
|                            |                      |                                                                          | 3/5/99        | ST2      | NEGATIVE             |          |                            |               |
|                            |                      |                                                                          | 4/2/99        | ST3      | PV1                  | SABIN    | <u>0.11</u>                |               |
|                            |                      |                                                                          | 4/30/99       | ST4      | NPEV                 |          |                            | EV80          |
|                            |                      |                                                                          | 5/28/99       | ST5      | NPEV                 |          |                            | CA4           |
|                            |                      |                                                                          | 6/25/99       | ST6      | NEGATIVE             |          |                            |               |
|                            |                      |                                                                          | 7/22/99       | ST7      | NEGATIVE             |          |                            |               |
|                            |                      |                                                                          | 8/18/99       | ST8      | NPEV                 |          |                            | E4            |
| N/50                       | Inf.                 | Unk.                                                                     | 9/16/98       | ST1      | PV1                  | SABIN    |                            |               |
|                            |                      |                                                                          | 10/19/98      | ST2      | NEGATIVE             |          |                            |               |
|                            |                      |                                                                          | 11/2/98       | ST3      | PV3                  | SABIN    |                            |               |
|                            |                      |                                                                          | 11/9/98       | ST4      | PV3                  | SABIN    |                            |               |
|                            |                      |                                                                          | 12/3/98       | ST5      | PV3                  | SABIN    | 0.32                       |               |
|                            |                      |                                                                          | 12/8/98       | ST6      | PV3                  | SABIN    |                            |               |
|                            |                      |                                                                          | 1/4/99        | ST7      | NEGATIVE             |          |                            |               |
|                            |                      |                                                                          | 2/4/99        | ST8      | NEGATIVE             |          |                            |               |
|                            |                      |                                                                          | 3/5/99        | ST9      | NEGATIVE             |          |                            |               |

| Participant ID/age, months | HIV infection status | Routine OPV doses                                       | Specimen Date | Specimen | Viral culture result | Genotype | Nucleotide changes, % | NPEV serotype      |
|----------------------------|----------------------|---------------------------------------------------------|---------------|----------|----------------------|----------|-----------------------|--------------------|
|                            |                      |                                                         | 4/2/99        | ST10     | NEGATIVE             |          |                       |                    |
|                            |                      |                                                         | 4/30/99       | ST11     | NPEV                 |          |                       | CA4                |
|                            |                      |                                                         | 5/28/99       | ST12     | NEGATIVE             |          |                       |                    |
|                            |                      |                                                         | 6/25/99       | ST13     | NEGATIVE             |          |                       |                    |
|                            |                      |                                                         | 7/22/99       | ST14     | NEGATIVE             |          |                       |                    |
| O/30                       | Inf.                 | 3 doses, during enrolment (10/14/98, 11/11/98, 12/9/98) | 9/16/98       | ST1      | PV1                  | SABIN    |                       |                    |
|                            |                      |                                                         | 10/19/98      | ST2      | PV1                  | SABIN    |                       |                    |
|                            |                      |                                                         | 11/2/98       | ST3      | PV2                  | SABIN    |                       |                    |
|                            |                      |                                                         | 11/9/98       | ST4      | NPEV                 |          |                       | E25                |
|                            |                      |                                                         | 12/3/98       | ST5      | NEGATIVE             |          |                       |                    |
|                            |                      |                                                         | 12/8/98       | ST6      | NEGATIVE             |          |                       |                    |
|                            |                      |                                                         | 1/4/99        | ST7      | NEGATIVE             |          |                       |                    |
|                            |                      |                                                         | 2/4/99        | ST8      | NEGATIVE             |          |                       |                    |
|                            |                      |                                                         | 3/5/99        | ST9      | NPEV                 |          |                       | E25                |
|                            |                      |                                                         | 4/2/99        | ST10     | NPEV                 |          |                       | CA4                |
|                            |                      |                                                         | 4/30/99       | ST11     | NPEV                 |          |                       | EV80               |
|                            |                      |                                                         | 5/28/99       | ST12     | NPEV                 |          |                       | CA24               |
|                            |                      |                                                         | 6/25/99       | ST13     | NEGATIVE             |          |                       |                    |
|                            |                      |                                                         | 7/22/99       | ST14     | NEGATIVE             |          |                       |                    |
|                            |                      |                                                         | 8/18/99       | ST15     | NPEV                 |          |                       | EV80               |
| P/44                       | Inf.                 | 3 doses, in 1995-1996                                   | 4/2/99        | ST1      | NPEV                 |          |                       | EV99               |
|                            |                      |                                                         | 4/30/99       | ST2      | NPEV                 |          |                       | Unresolved mixture |
|                            |                      |                                                         | 5/28/99       | ST3      | NPEV                 |          |                       | EV80               |
|                            |                      |                                                         | 6/25/99       | ST4      | NEGATIVE             |          |                       |                    |
|                            |                      |                                                         | 7/22/99       | ST5      | NEGATIVE             |          |                       |                    |
|                            |                      |                                                         | 8/18/99       | ST6      | NPEV                 |          |                       | CA24               |
| V/5                        | Inf.                 | 3 doses, during enrolment (3/10/99, 5/5/99, 6/23/99)    | 2/4/99        | ST1      | NEV                  |          |                       |                    |
|                            |                      |                                                         | 3/5/99        | ST2      | NEV                  |          |                       |                    |
|                            |                      |                                                         | 4/2/99        | ST3      | NEGATIVE             |          |                       |                    |
|                            |                      |                                                         | 4/30/99       | ST4      | NPEV                 |          |                       | CA4                |
|                            |                      |                                                         | 5/28/99       | ST5      | NEGATIVE             |          |                       |                    |
|                            |                      |                                                         | 6/25/99       | ST6      | NEGATIVE             |          |                       |                    |
|                            |                      |                                                         | 7/22/99       | ST7      | NEGATIVE             |          |                       |                    |
|                            |                      |                                                         | 8/18/99       | ST8      | NEGATIVE             |          |                       |                    |
| W/17                       | Inf.                 | Unk.                                                    | 4/2/99        | ST1      | NPEV                 |          |                       | CA24               |
|                            |                      |                                                         | 4/30/99       | ST2      | NPEV                 |          |                       | EV80               |
|                            |                      |                                                         | 5/28/99       | ST3      | NEGATIVE             |          |                       |                    |
|                            |                      |                                                         | 6/25/99       | ST4      | NEGATIVE             |          |                       |                    |
|                            |                      |                                                         | 7/22/99       | ST5      | NPEV                 |          |                       | EV80               |
|                            |                      |                                                         | 8/18/99       | ST6      | NEGATIVE             |          |                       |                    |
| X/22                       | Inf.                 | 3 doses, in 1997                                        | 4/2/99        | ST1      | NPEV                 |          |                       | CA4                |

| Participant ID/age, months | HIV infection status | Routine OPV doses                                                         | Specimen Date | Specimen | Viral culture result | Genotype | Nucleotide changes, %               | NPEV serotype |
|----------------------------|----------------------|---------------------------------------------------------------------------|---------------|----------|----------------------|----------|-------------------------------------|---------------|
|                            |                      |                                                                           | 4/30/99       | ST2      | NPEV                 |          |                                     | CA4, EV80     |
|                            |                      |                                                                           | 5/28/99       | ST3      | NEGATIVE             |          |                                     |               |
|                            |                      |                                                                           | 6/25/99       | ST4      | NEGATIVE             |          |                                     |               |
|                            |                      |                                                                           | 7/22/99       | ST5      | NPEV                 |          |                                     |               |
|                            |                      |                                                                           | 8/18/99       | ST6      | NEGATIVE             |          |                                     |               |
| B/19                       | Uninf.               | Unk.                                                                      | 9/16/98       | ST1      | PV1                  | SABIN    | <u>0</u>                            |               |
|                            |                      |                                                                           | 10/19/98      | ST2      | PV1                  | SABIN    | <u>0.11</u>                         |               |
|                            |                      |                                                                           | 11/2/98       | ST3      | NEGATIVE             |          |                                     |               |
|                            |                      |                                                                           | 11/9/98       | ST4      | NEGATIVE             |          |                                     |               |
|                            |                      |                                                                           | 12/3/98       | ST5      | NEGATIVE             |          |                                     |               |
|                            |                      |                                                                           | 12/8/98       | ST6      | NEGATIVE             |          |                                     |               |
|                            |                      |                                                                           | 1/4/99        | ST7      | NEGATIVE             |          |                                     |               |
|                            |                      |                                                                           | 2/4/99        | ST8      | NEGATIVE             |          |                                     |               |
| I/30                       | Uninf                | 3 doses, shortly before and during enrolment (9/2/98, 10/14/98, 11/11/98) | 9/16/98       | ST1      | PV3                  | SABIN    | 0                                   |               |
|                            |                      |                                                                           | 10/19/98      | ST2      | NPEV                 |          |                                     |               |
|                            |                      |                                                                           | 11/2/98       | ST3      | PV1,2                | SABIN    | 0 (PV1), 0 (PV2)                    |               |
|                            |                      |                                                                           | 11/9/98       | ST4      | PV1,2                | SABIN    |                                     |               |
|                            |                      |                                                                           | 12/3/98       | ST5      | PV1                  | SABIN    | <u>0.44</u>                         |               |
|                            |                      |                                                                           | 12/8/98       | ST6      | NPEV                 |          |                                     |               |
|                            |                      |                                                                           | 1/4/99        | ST7      | PV3                  | SABIN    |                                     |               |
|                            |                      |                                                                           | 2/4/99        | ST8      | NEGATIVE             |          |                                     |               |
|                            |                      |                                                                           | 3/5/99        | ST9      | NEGATIVE             |          |                                     |               |
|                            |                      |                                                                           | 4/2/99        | ST10     | NPEV                 |          |                                     |               |
|                            |                      |                                                                           | 4/30/99       | ST11     | NPEV                 |          |                                     |               |
|                            |                      |                                                                           | 5/20/99       | ST12     | NPEV                 |          |                                     |               |
|                            |                      |                                                                           | 6/25/99       | ST13     | NPEV                 |          |                                     |               |
|                            |                      |                                                                           | 7/22/99       | ST14     | NPEV                 |          |                                     |               |
|                            |                      |                                                                           | 8/18/99       | ST15     | NPEV                 |          |                                     |               |
| J/4                        | Uninf                | 3 doses, dates unk.                                                       | 12/8/98       | ST1      | PV1,2,3              | SABIN    | <u>0 (PV1), 0 (PV2), 0.36 (PV3)</u> |               |
|                            |                      |                                                                           | 1/4/99        | ST2      | NEGATIVE             |          |                                     |               |
|                            |                      |                                                                           | 2/4/99        | ST3      | PV1                  | SABIN    | 0.33                                |               |
|                            |                      |                                                                           | 3/5/99        | ST4      | PV3                  | SABIN    |                                     |               |
|                            |                      |                                                                           | 4/2/99        | ST5      | PV3                  | SABIN    | 0                                   |               |
|                            |                      |                                                                           | 4/30/99       | ST6      | NPEV                 |          |                                     |               |
|                            |                      |                                                                           | 5/28/99       | ST7      | NPEV                 |          |                                     |               |
| K/4                        | Uninf                | Unk.                                                                      | 12/8/98       | ST1      | NEV                  |          |                                     |               |
|                            |                      |                                                                           | 1/4/99        | ST2      | NEV                  |          |                                     |               |
|                            |                      |                                                                           | 2/4/99        | ST3      | PV1                  | SABIN    | <u>0.11</u>                         |               |
|                            |                      |                                                                           | 3/5/99        | ST4      | PV2                  | SABIN    |                                     |               |
|                            |                      |                                                                           | 4/2/99        | ST5      | PV2                  | SABIN    | 0.22                                |               |
|                            |                      |                                                                           | 4/30/99       | ST6      | NPEV                 |          |                                     |               |

| Participant ID/age, months | HIV infection status | Routine OPV doses                           | Specimen Date | Specimen | Viral culture result | Genotype | Nucleotide changes, % | NPEV serotype |
|----------------------------|----------------------|---------------------------------------------|---------------|----------|----------------------|----------|-----------------------|---------------|
|                            |                      |                                             | 5/28/99       | ST7      | NPEV                 |          |                       | CA24          |
| Q/14                       | Uninf                | Unk.                                        | 9/16/98       | ST1      | NEGATIVE             |          |                       |               |
|                            |                      |                                             | 10/19/98      | ST2      | NEGATIVE             |          |                       |               |
|                            |                      |                                             | 11/2/98       | ST3      | NEGATIVE             |          |                       |               |
|                            |                      |                                             | 11/9/98       | ST4      | NEGATIVE             |          |                       |               |
|                            |                      |                                             | 12/3/98       | ST5      | NPEV                 |          |                       | EV99          |
|                            |                      |                                             | 12/8/98       | ST6      | NPEV                 |          |                       | EV99          |
|                            |                      |                                             | 1/4/99        | ST7      | NEGATIVE             |          |                       |               |
|                            |                      |                                             | 2/4/99        | ST8      | NEGATIVE             |          |                       |               |
|                            |                      |                                             | 3/5/99        | ST9      | NEGATIVE             |          |                       |               |
| R/14                       | Uninf                | Unk.                                        | 9/16/98       | ST1      | NPEV                 |          |                       | E2            |
|                            |                      |                                             | 10/19/98      | ST2      | NEGATIVE             |          |                       |               |
|                            |                      |                                             | 11/2/98       | ST3      | NEGATIVE             |          |                       |               |
|                            |                      |                                             | 11/9/98       | ST4      | NEGATIVE             |          |                       |               |
|                            |                      |                                             | 12/3/98       | ST5      | NPEV                 |          |                       | E25           |
|                            |                      |                                             | 12/8/98       | ST6      | NPEV                 |          |                       | E25           |
|                            |                      |                                             | 1/4/99        | ST7      | NEGATIVE             |          |                       |               |
|                            |                      |                                             | 2/4/99        | ST8      | NPEV                 |          |                       | CA24          |
|                            |                      |                                             | 3/5/99        | ST9      | NEGATIVE             |          |                       |               |
|                            |                      |                                             | 4/2/99        | ST10     | NEGATIVE             |          |                       |               |
|                            |                      |                                             | 4/30/99       | ST11     | NEGATIVE             |          |                       |               |
| S/12                       | Uninf                | 3 doses, in 1997-1998 (last dose - 4/29/98) | 9/16/98       | ST1      | NEGATIVE             |          |                       |               |
|                            |                      |                                             | 10/19/98      | ST2      | NEGATIVE             |          |                       |               |
|                            |                      |                                             | 11/2/98       | ST3      | NEGATIVE             |          |                       |               |
|                            |                      |                                             | 11/9/98       | ST4      | NEGATIVE             |          |                       |               |
|                            |                      |                                             | 12/3/98       | ST5      | NPEV                 |          |                       | E25           |
|                            |                      |                                             | 12/8/98       | ST6      | NPEV                 |          |                       | E25           |
|                            |                      |                                             | 1/4/99        | ST7      | NPEV                 |          |                       | E25           |
|                            |                      |                                             | 2/4/99        | ST8      | NPEV                 |          |                       | CA16          |
|                            |                      |                                             | 3/5/99        | ST9      | NEGATIVE             |          |                       |               |
|                            |                      |                                             | 4/2/99        | ST10     | NEGATIVE             |          |                       |               |
|                            |                      |                                             | 4/30/99       | ST11     | NPEV                 |          |                       | EV80          |
|                            |                      |                                             | 5/28/99       | ST12     | NEGATIVE             |          |                       |               |
| T/9                        | Uninf                | 4 doses, in 1998 (last dose - 11/11/98)     | 1/4/99        | ST1      | NEV                  |          |                       |               |
|                            |                      |                                             | 2/4/99        | ST2      | NEV                  |          |                       |               |
|                            |                      |                                             | 3/5/99        | ST3      | NEGATIVE             |          |                       |               |
|                            |                      |                                             | 4/2/99        | ST4      | NEGATIVE             |          |                       |               |
|                            |                      |                                             | 4/30/99       | ST5      | NEGATIVE             |          |                       |               |
|                            |                      |                                             | 5/28/99       | ST6      | NPEV                 |          |                       | CA24          |
|                            |                      |                                             | 6/25/99       | ST7      | NPEV                 |          |                       | E17           |
|                            |                      |                                             | 7/22/99       | ST8      | NPEV                 |          |                       | E4            |
| U/7                        | Uninf                | 3 doses, during                             | 2/4/99        | ST1      | NEV                  |          |                       |               |

| Participant ID/age, months | HIV infection status | Routine OPV doses                    | Specimen Date | Specimen | Viral culture result | Genotype | Nucleotide changes, % | NPEV serotype |
|----------------------------|----------------------|--------------------------------------|---------------|----------|----------------------|----------|-----------------------|---------------|
|                            |                      | enrolment (2/10/99, 3/10/99, 5/5/99) | 3/5/99        | ST2      | NEGATIVE             |          |                       |               |
|                            |                      |                                      | 4/2/99        | ST3      | PV3                  | SABIN    |                       |               |
|                            |                      |                                      | 4/30/99       | ST4      | NEGATIVE             |          |                       |               |
|                            |                      |                                      | 5/28/99       | ST5      | NEGATIVE             |          |                       |               |
|                            |                      |                                      | 6/25/99       | ST6      | NPEV                 |          |                       | E17           |
|                            |                      |                                      | 7/22/99       | ST7      | NPEV                 |          |                       | E4            |
|                            |                      |                                      | 8/18/99       | ST8      | NPEV                 |          |                       | CA24          |

Inf., infected; Uninf., uninfected; ST, stool; NPEV, non-polio enterovirus; NEV, non-enterovirus (virus not characterized further); unk., unknown.

Sequences presented in Figure are underlined.
